# Supplementary material for: Molecular Evolution of Phosphoprotein Phosphatases in Drosophila
Source: PubMed Central journal article supplement (PMC3137614; doi:10.1371/journal.pone.0022218), 2011-07-15

Supplementary Fig. S1

Insect PPPs

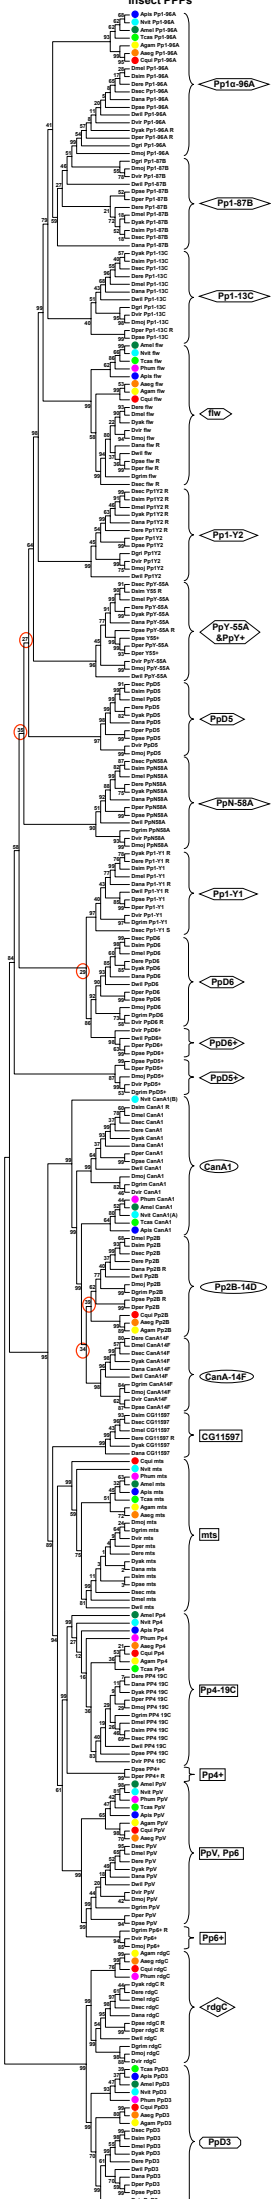

Supplement: pone.0022218.s001.pdf [file pone.0022218.s001.pdf]
