# Supplementary material for: Molecular Evolution of Phosphoprotein Phosphatases in Drosophila
Source: PubMed Central journal article supplement (PMC3137614; doi:10.1371/journal.pone.0022218), 2011-07-15

# Supplementary Fig. S2A

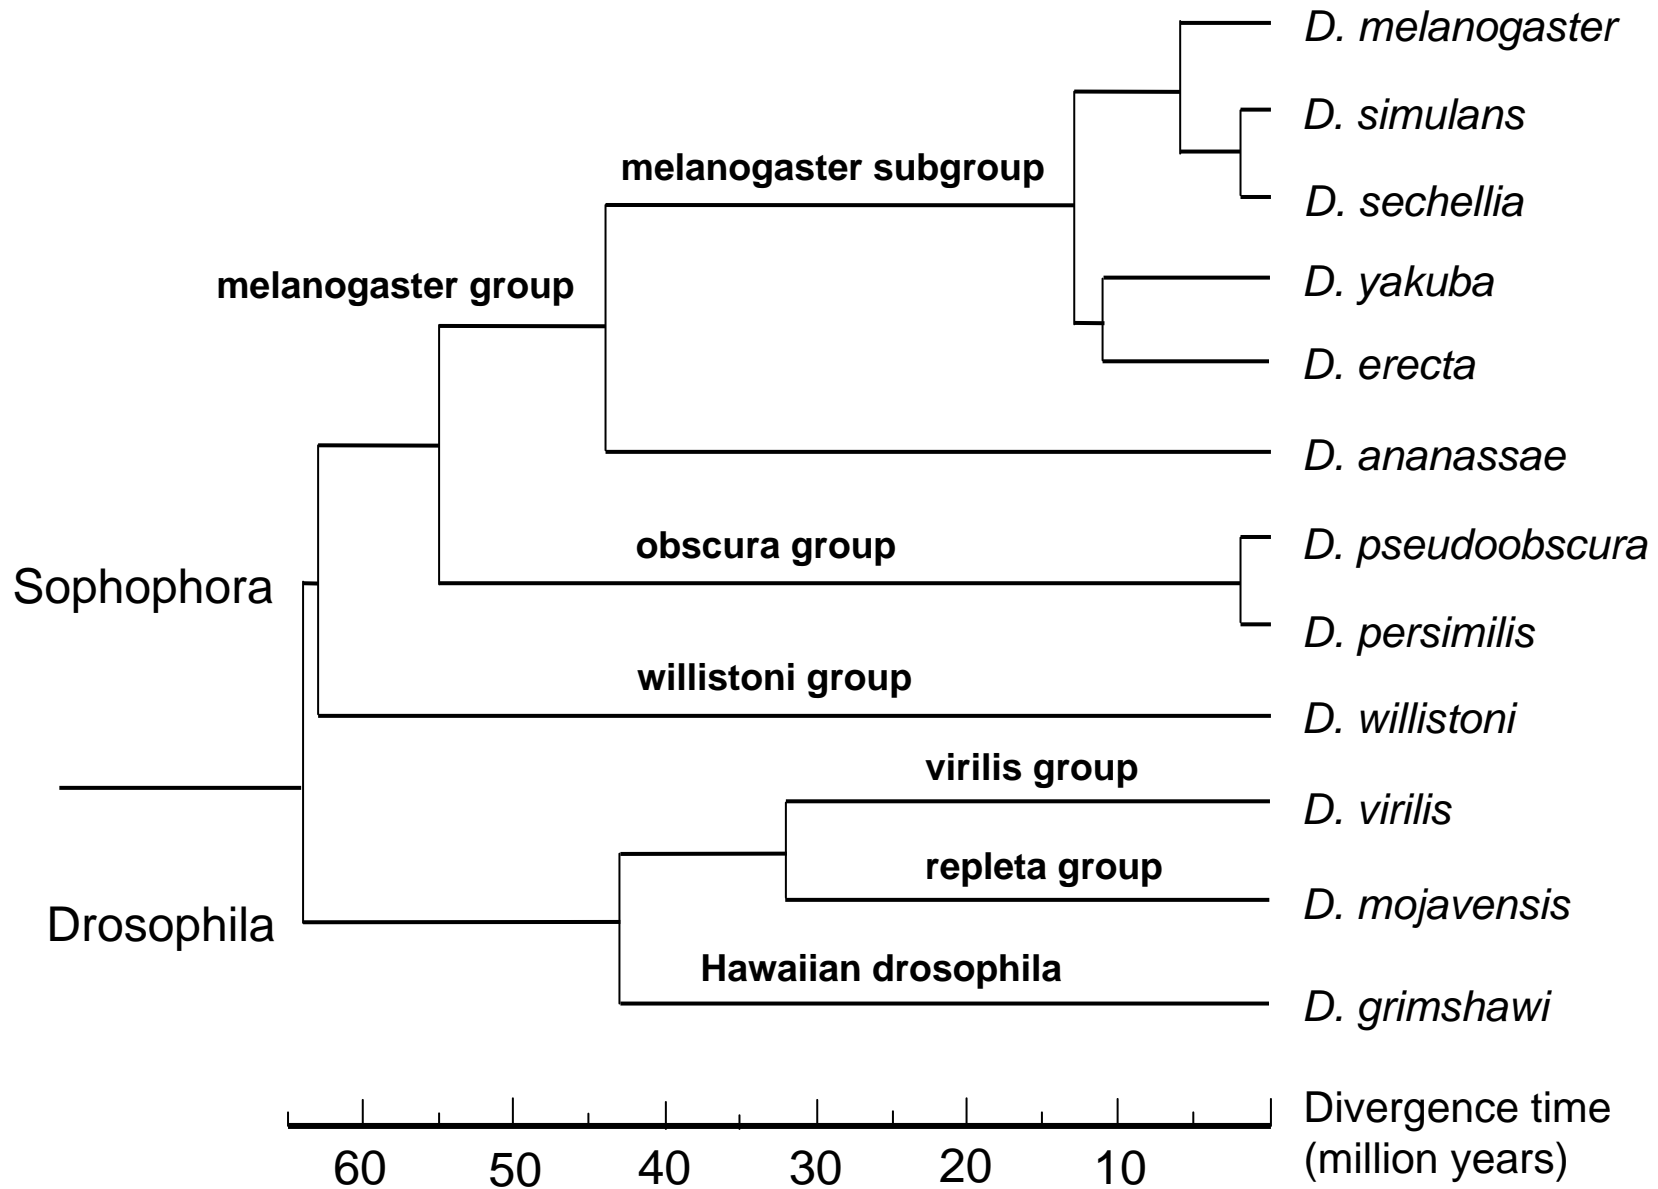

Drosophila PPPs

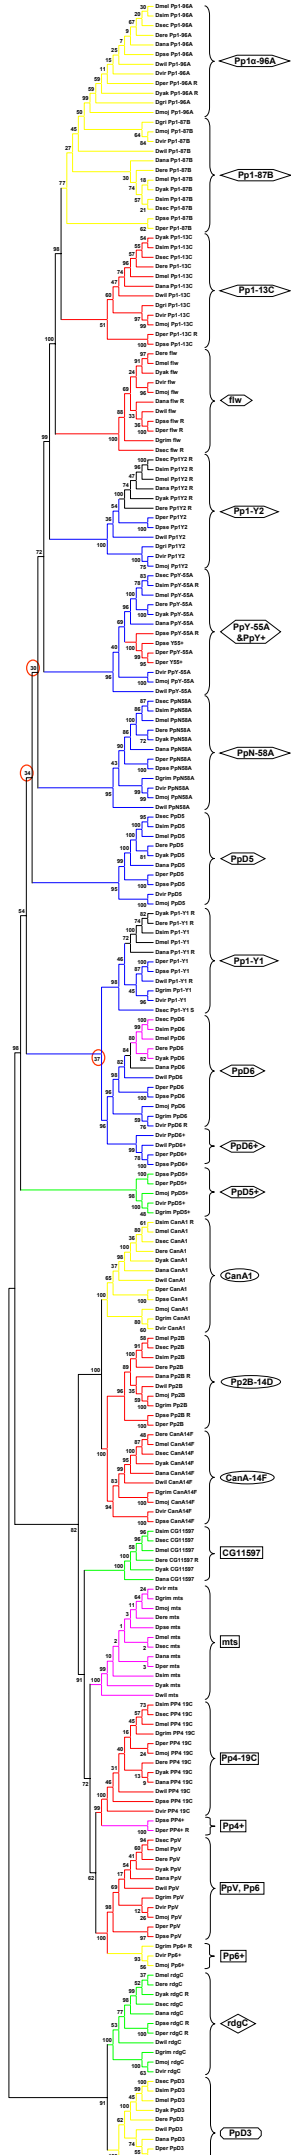

A B C D E Y

# Supplementary Fig. S2C

## Type 1 PPPs

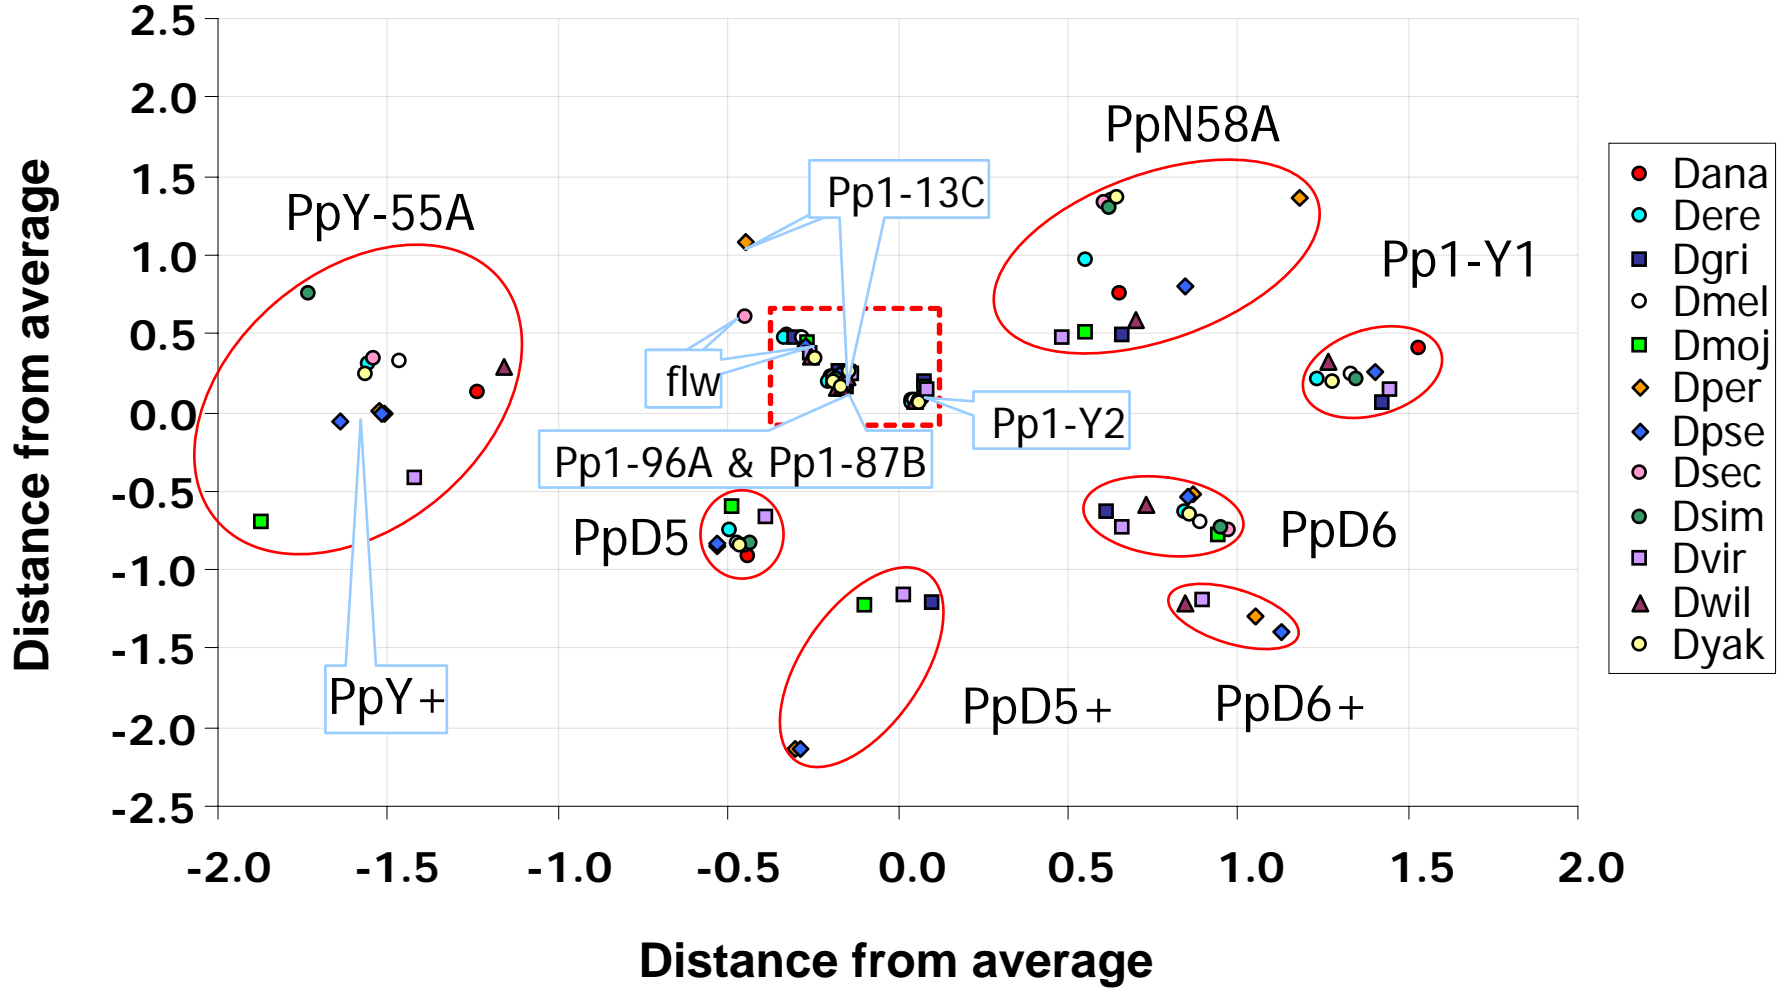

# Supplementary Fig. S2D

## „Classical” type 1 PPPs and Pp1-Y2

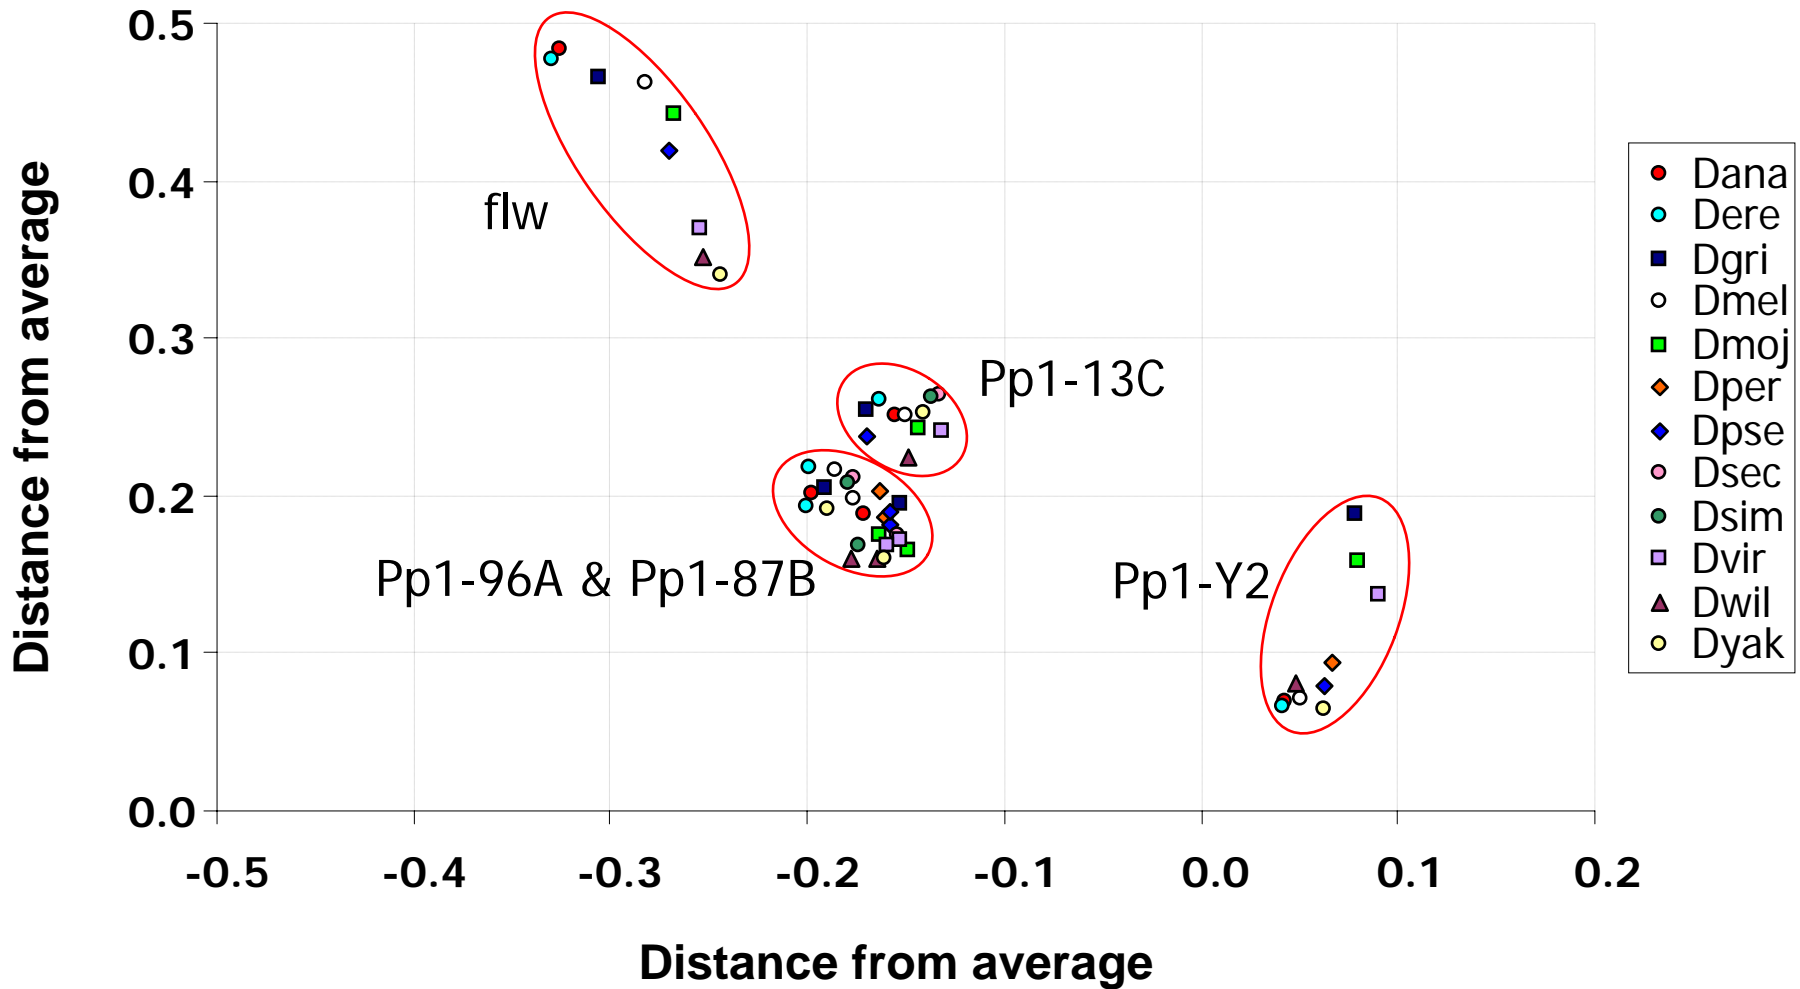

Supplement: pone.0022218.s002.pdf [file pone.0022218.s002.pdf]
