# Supplementary material for: Molecular Evolution of Phosphoprotein Phosphatases in Drosophila
Source: PubMed Central journal article supplement (PMC3137614; doi:10.1371/journal.pone.0022218), 2011-07-15

**Figure S3A**

*Drosophila melanogaster*

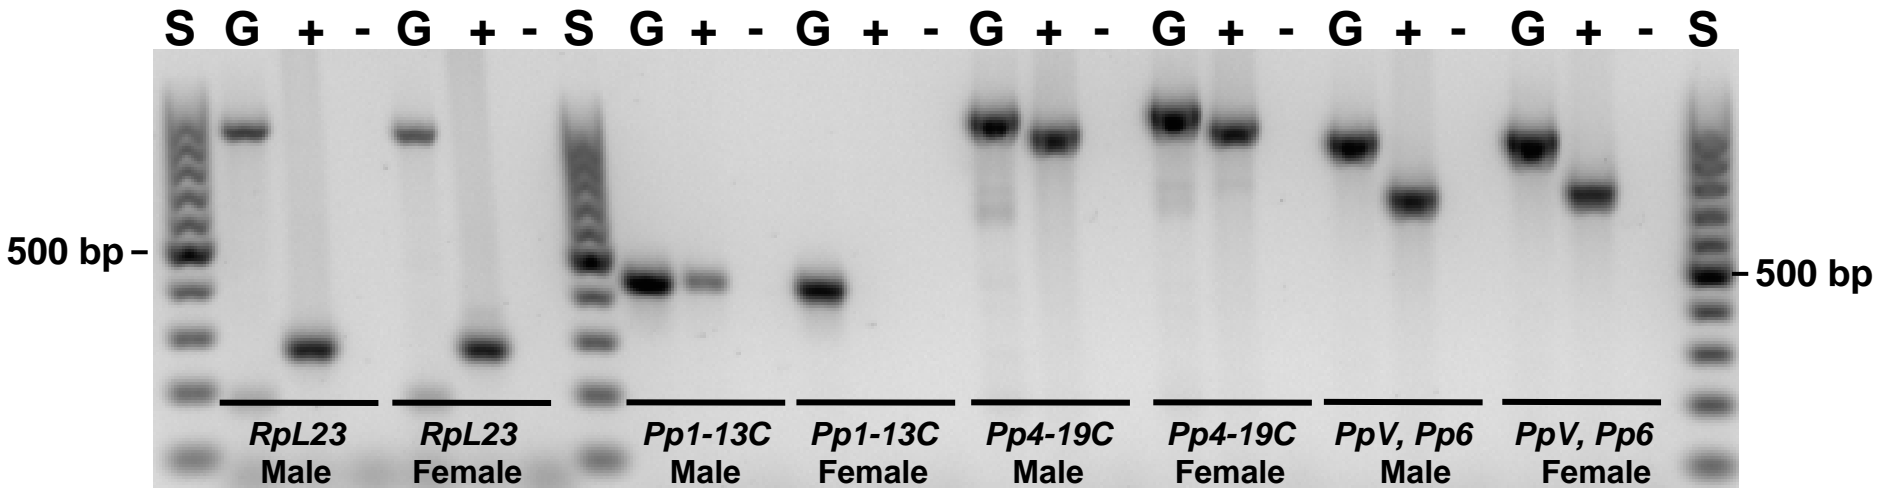

**Figure S3B**

*Drosophila ananassae*

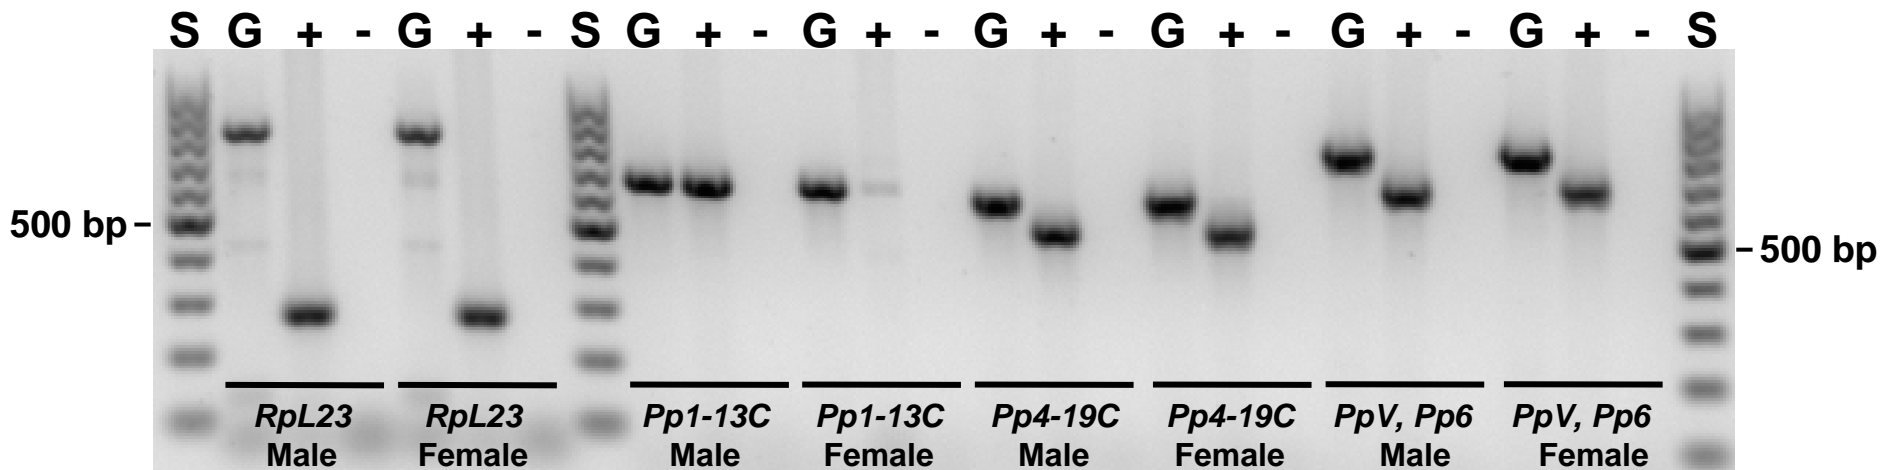

Figure S3C

*Drosophila pseudoobscura*

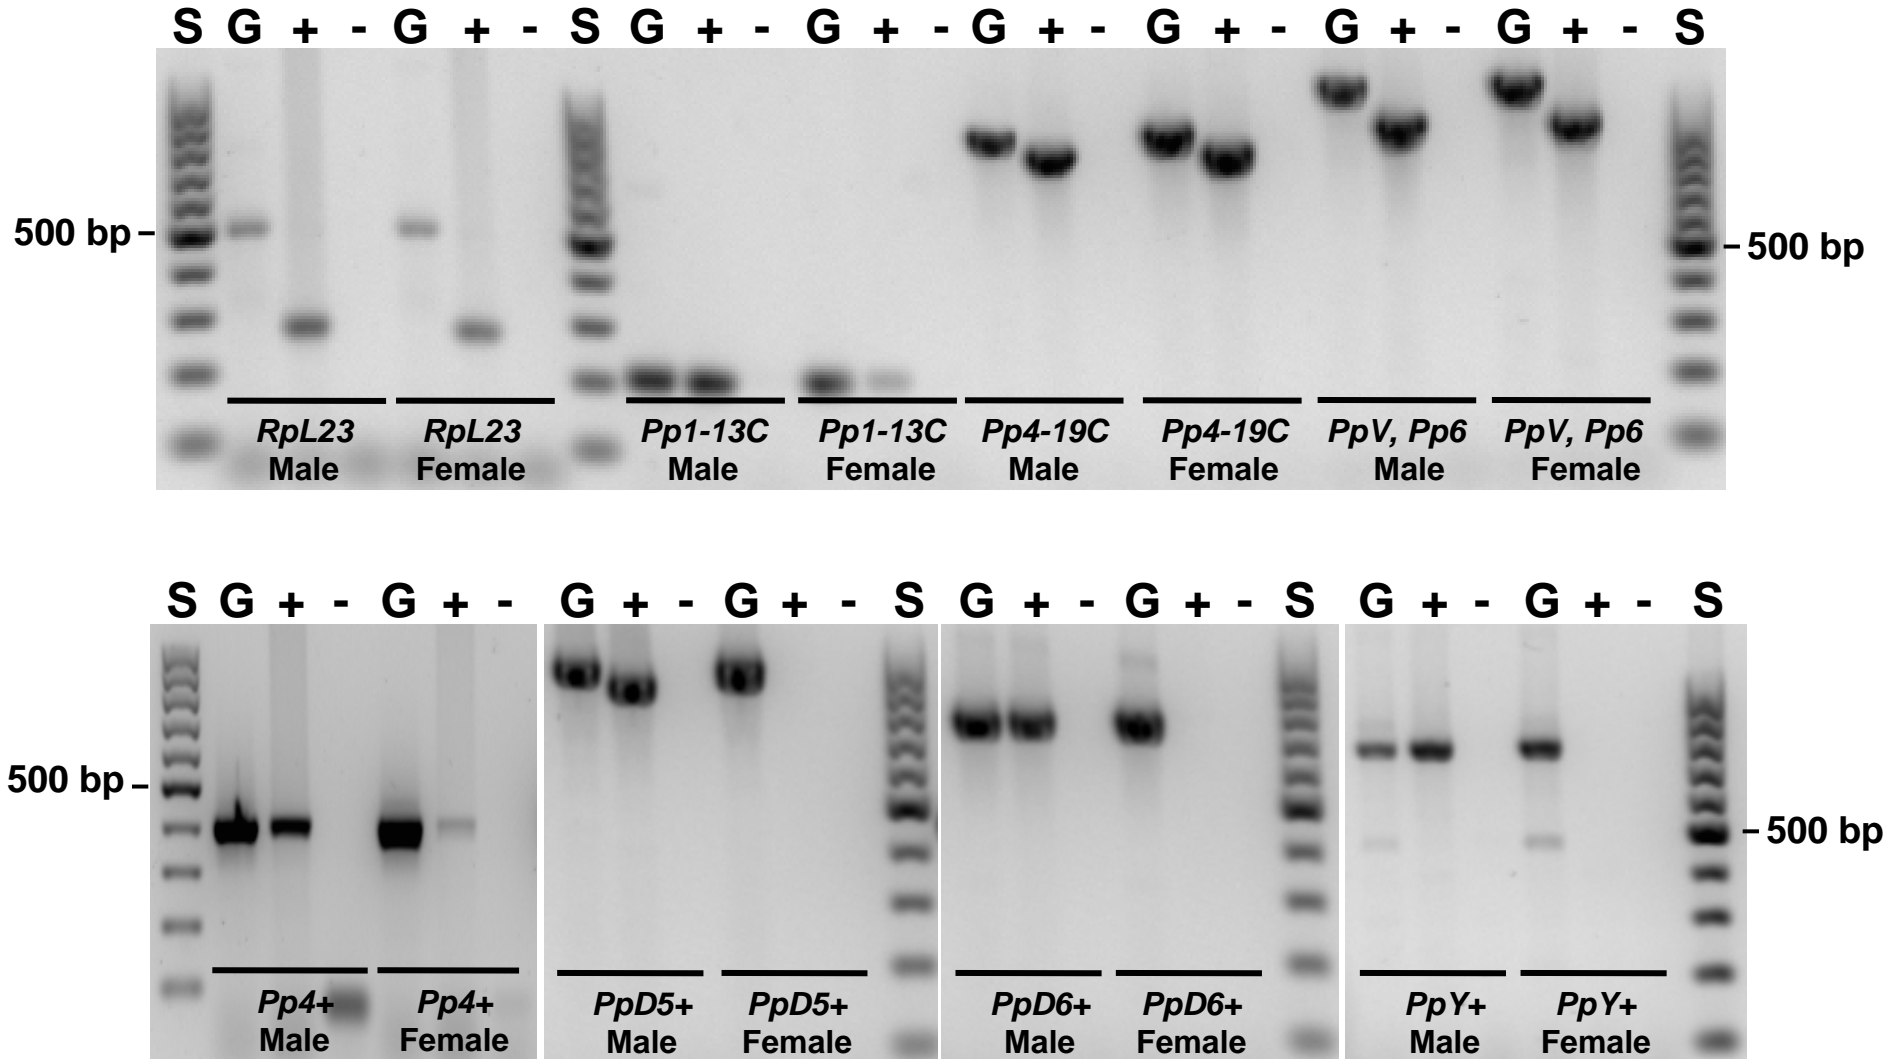

Figure S3D

*Drosophila willistoni*

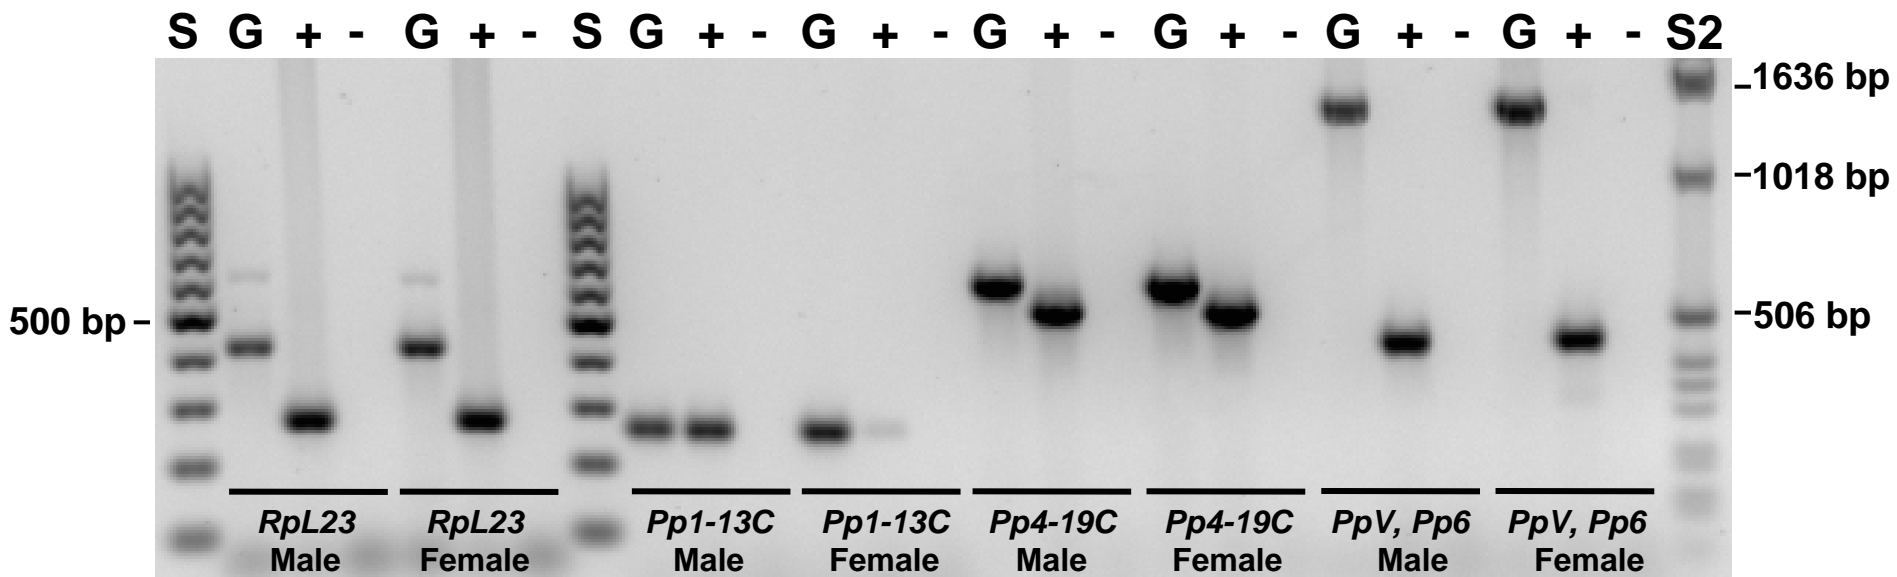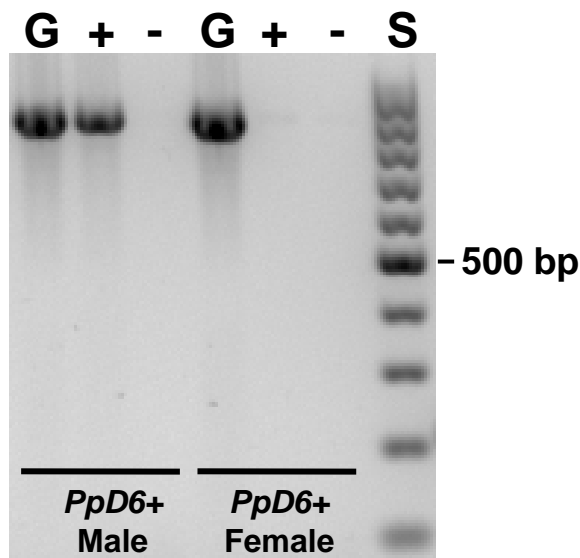

Figure S3E

*Drosophila virilis*

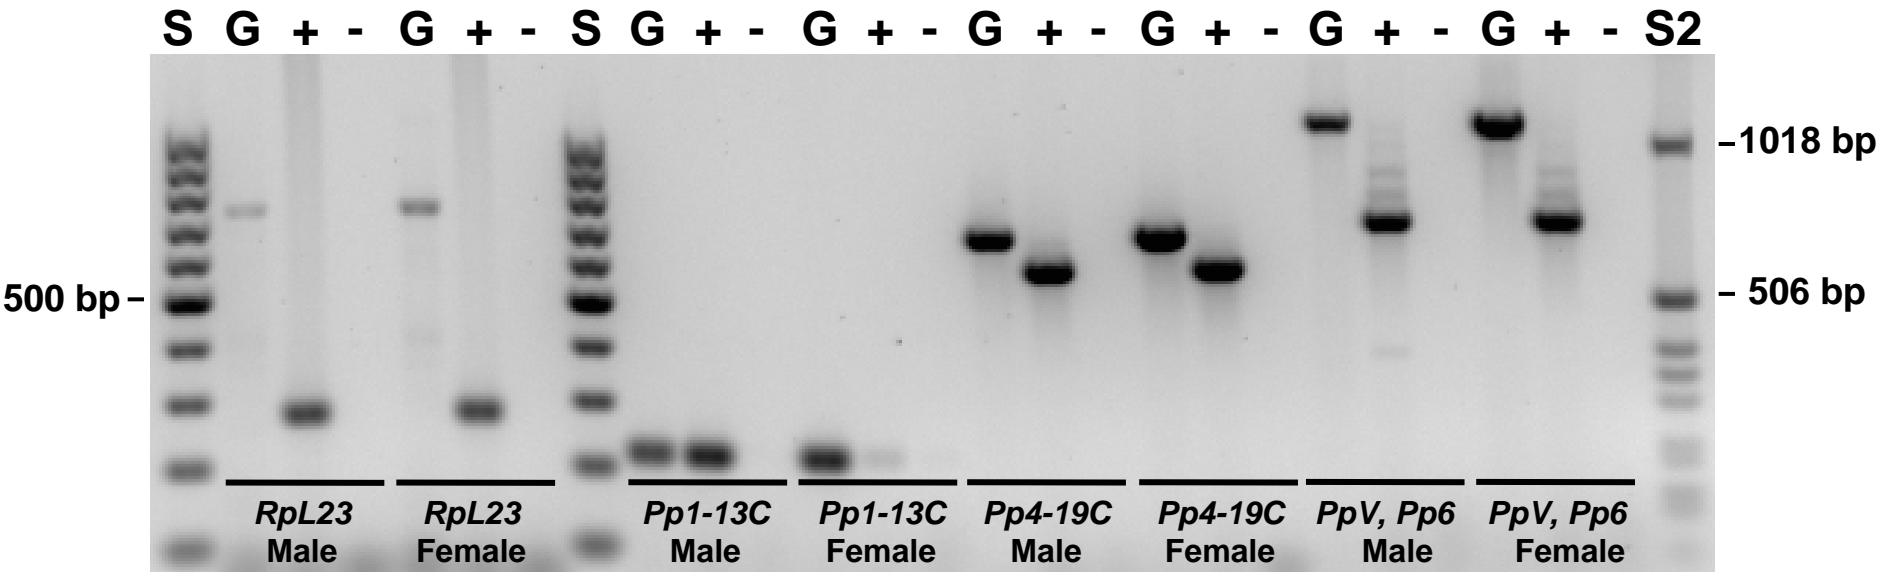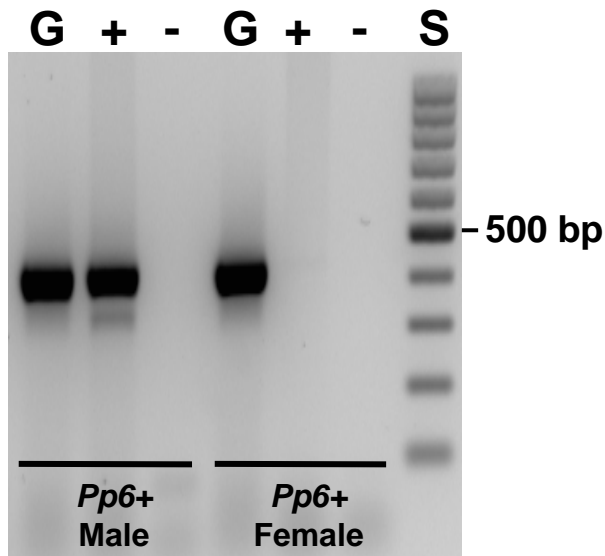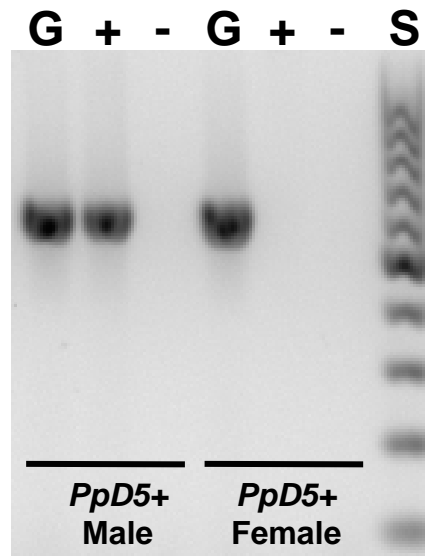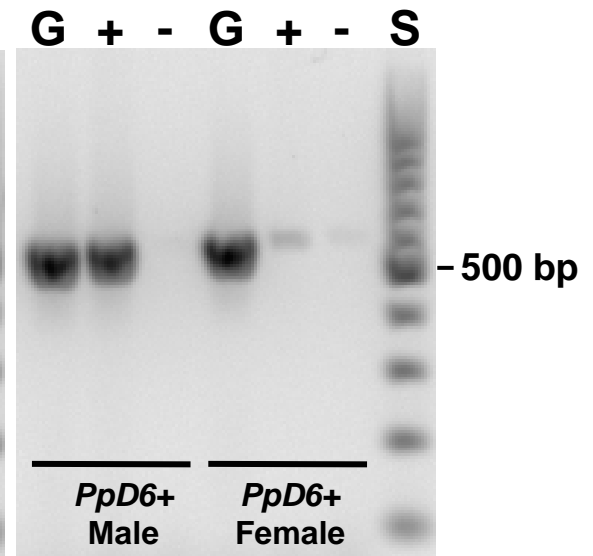

Supplement: pone.0022218.s003.pdf [file pone.0022218.s003.pdf]
