# Supplementary material for: Molecular Evolution of Phosphoprotein Phosphatases in Drosophila
Source: PubMed Central journal article supplement (PMC3137614; doi:10.1371/journal.pone.0022218), 2011-07-15
Supplement: pone.0022218.s004.pdf [file pone.0022218.s004.pdf]

Figure S4A

# *PpY-55A*

Inversion 1    Inversion 2

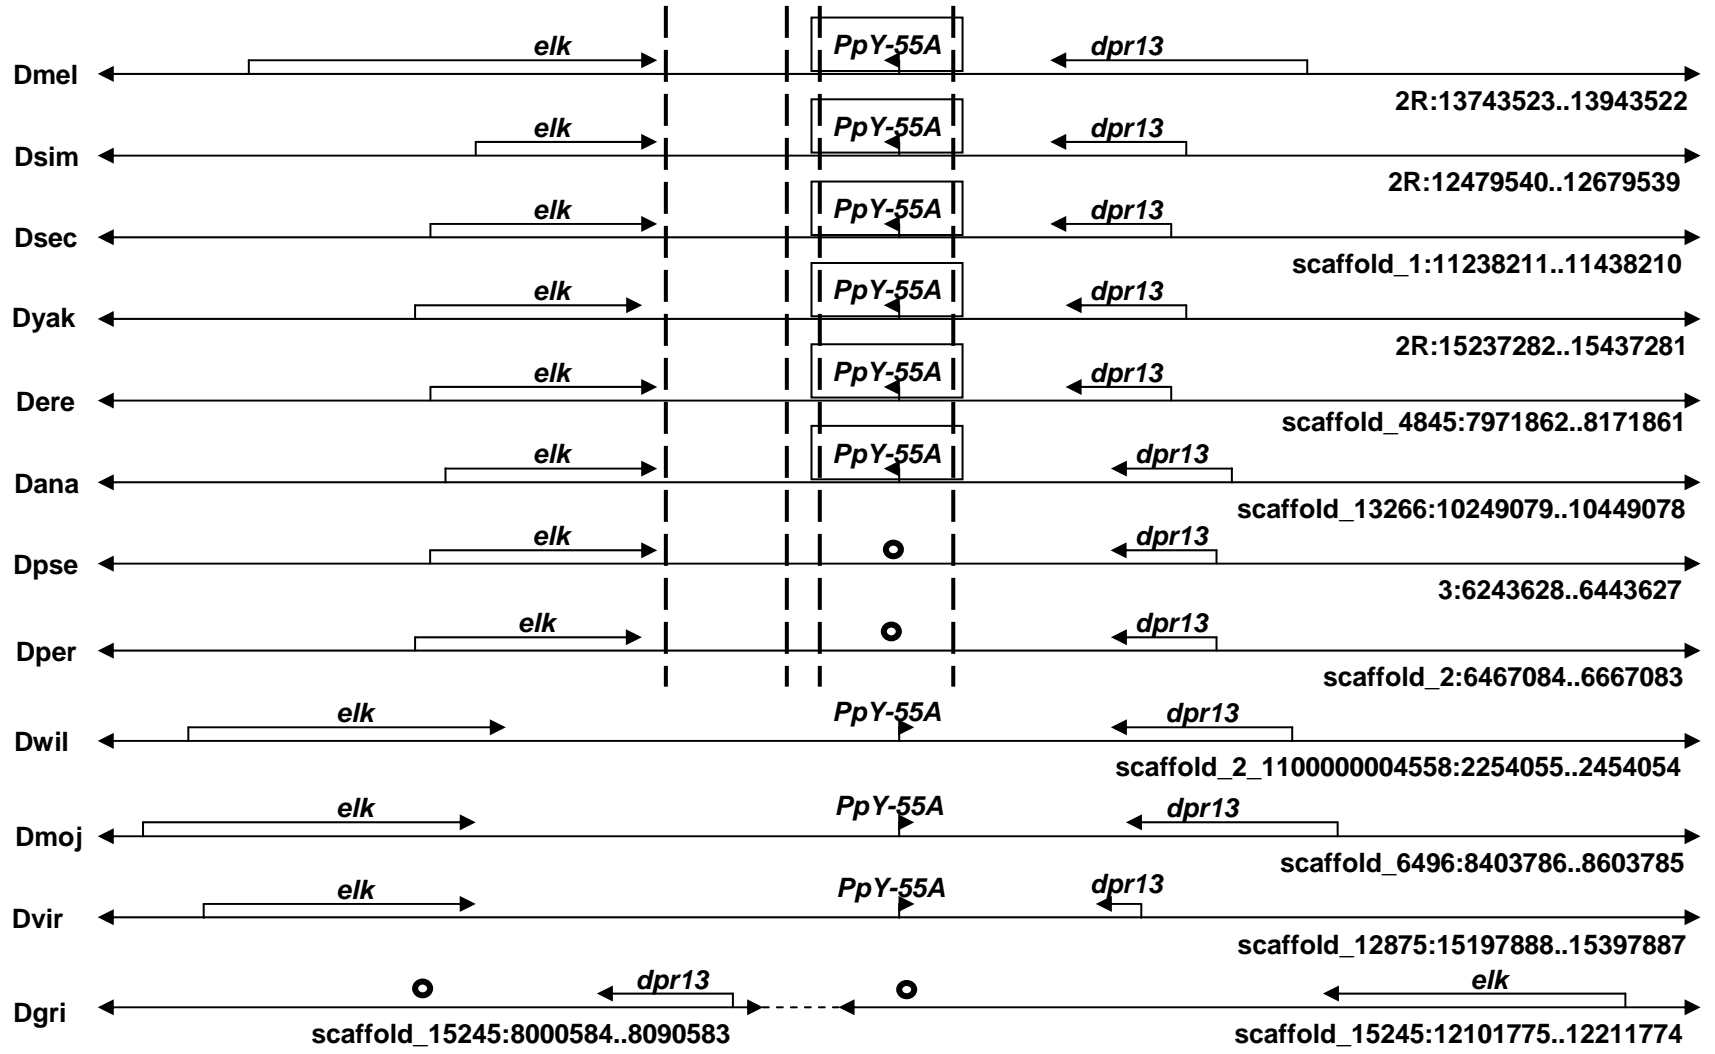

10 kb

Figure S4B

*PpY-55A*

Inversion 1    Inversion 2

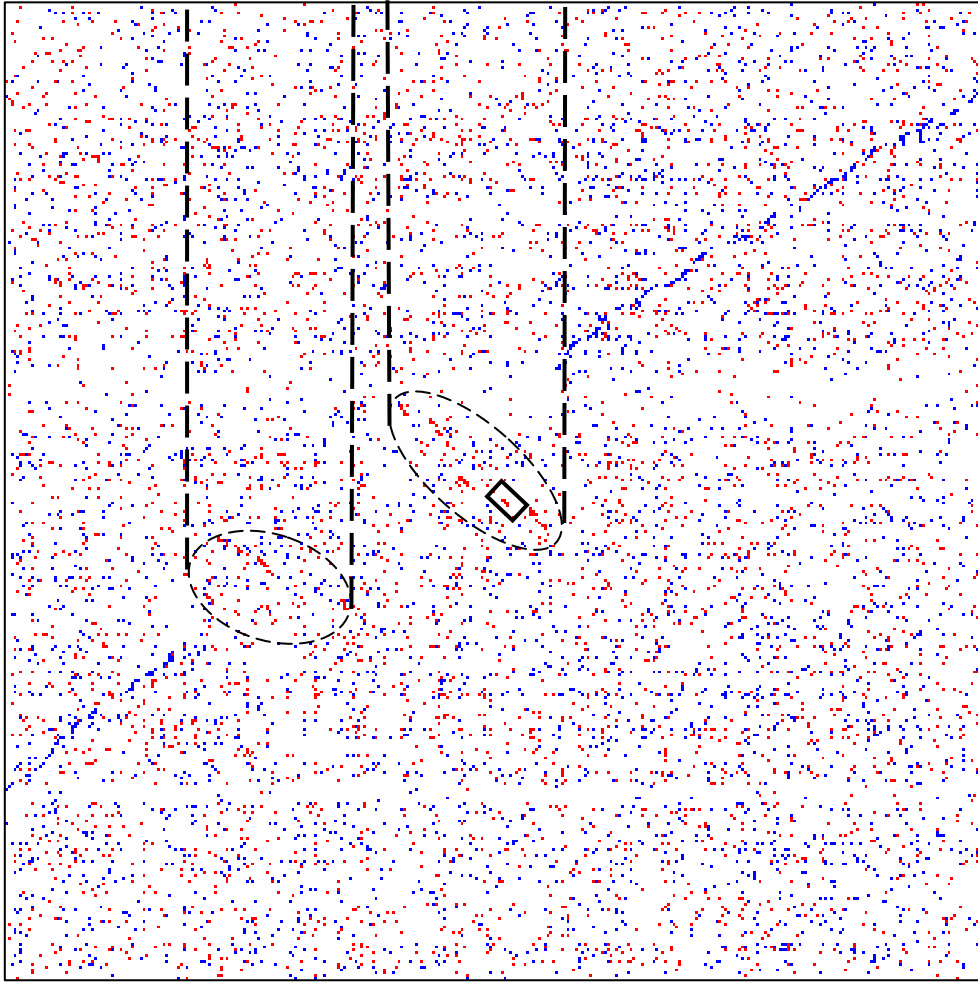

Dana scaffold\_13266: 10399078-10299078

Dwil scaffold\_2: 2304055-2404055

10 kb

Figure S4C

*PpD5+*

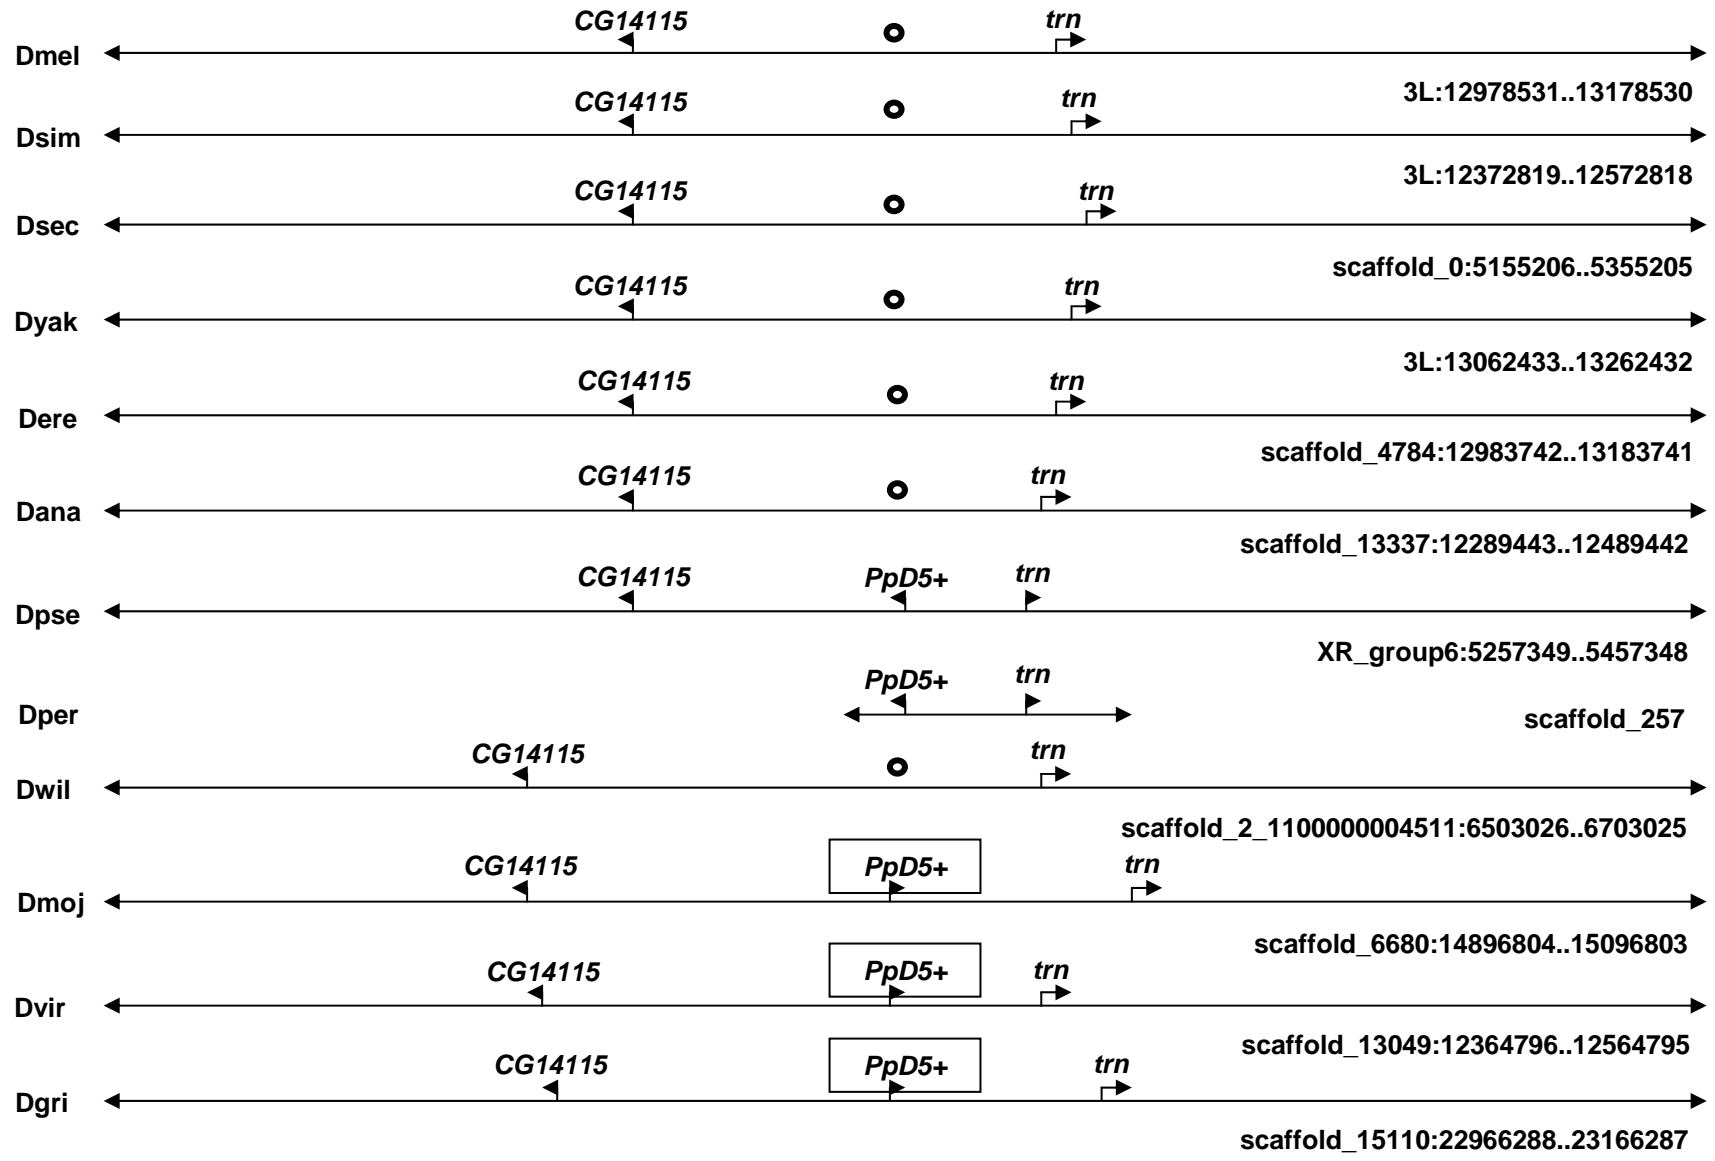

10 kb

**Figure S4D**

*PpD5+*

**Deletion**

**Inversion**

**Deletion**

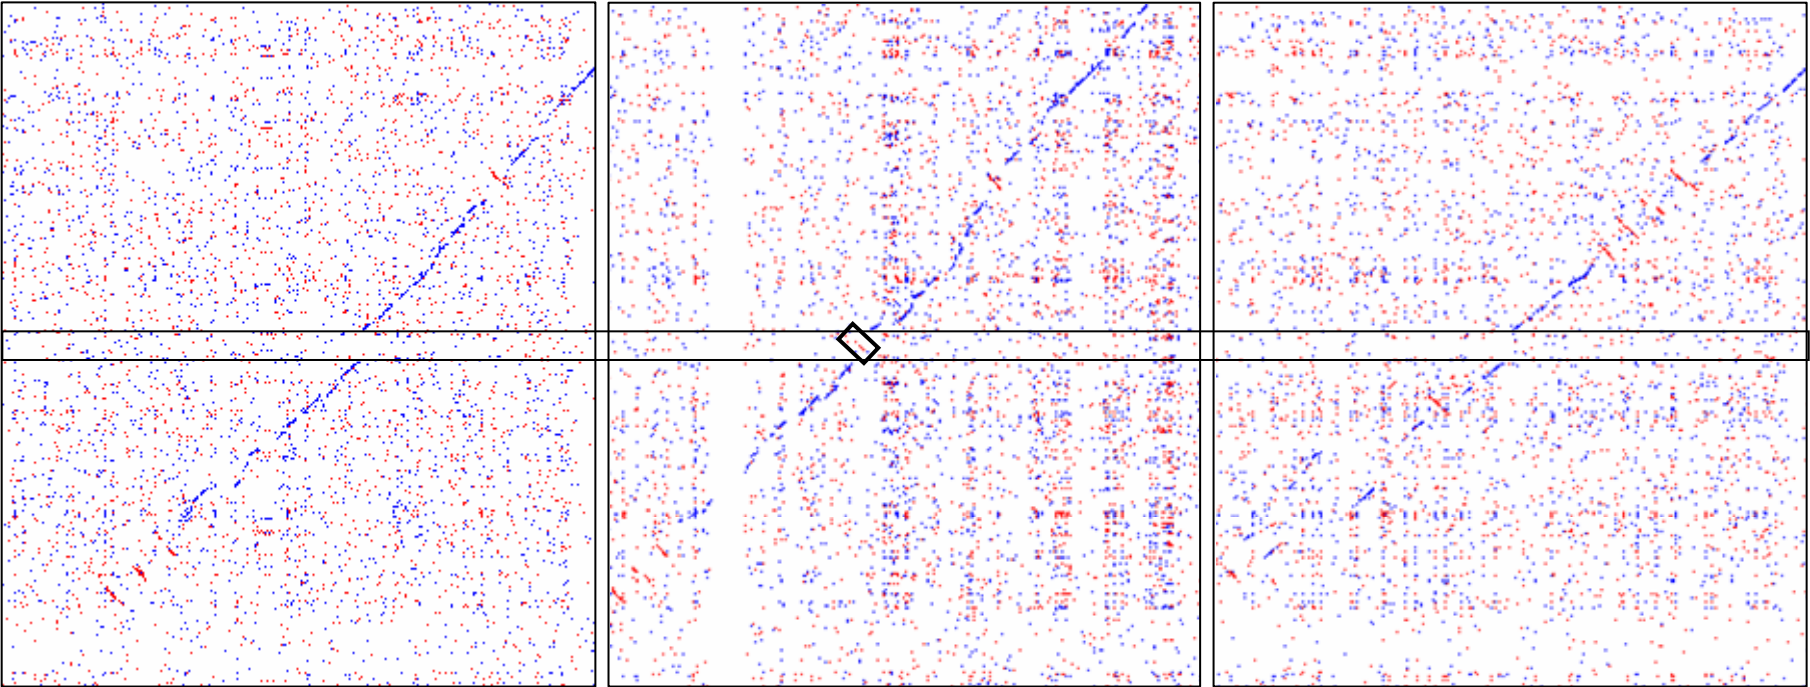

**Dana scaffold\_13337:  
12364442-12409442**

**Dpse scaffold\_XR\_group6:  
5337349-5382349**

**Dwil scaffold\_2\_110000004511:  
6558026-6603026**

10 kb

**Dvir scaffold\_13049:12439796-12489796**

Figure S4E

# *PpD5*

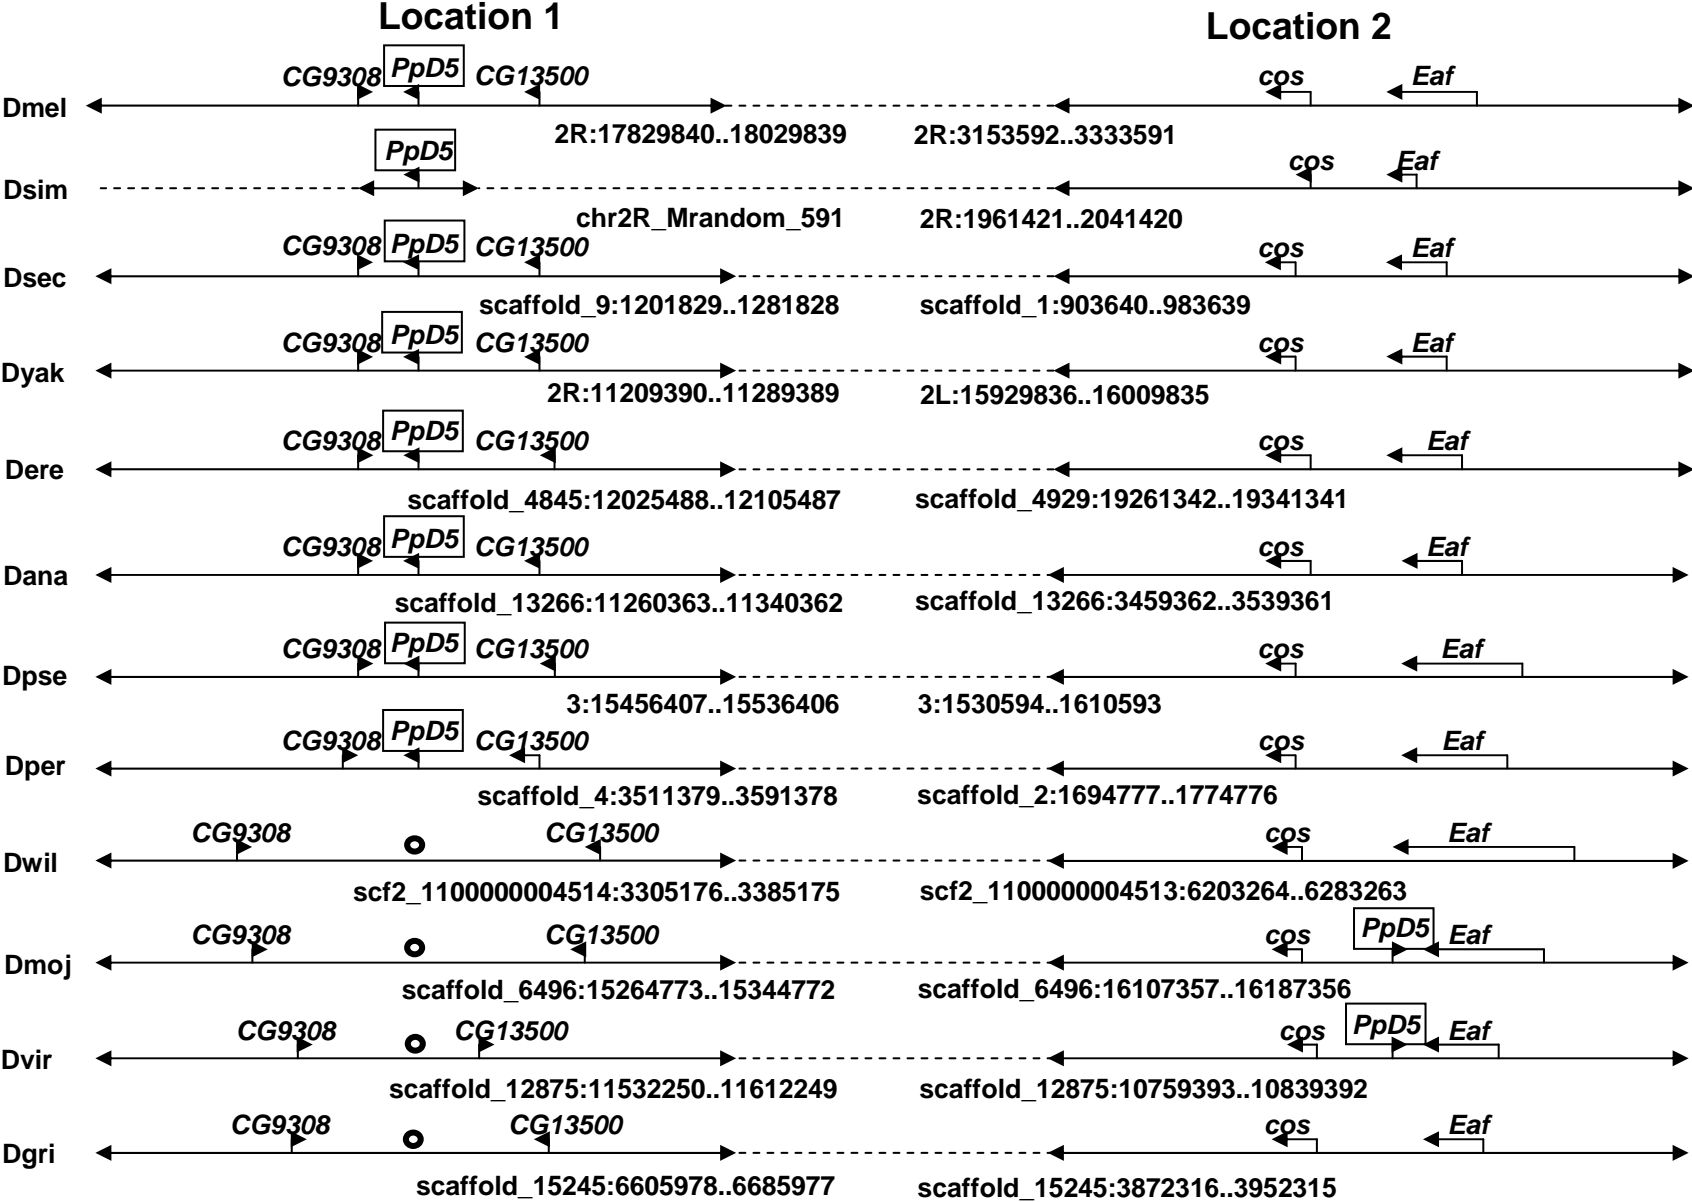

10 kb

**Figure S4F**

*PpD5*

**Gene Degradation in Location 1**

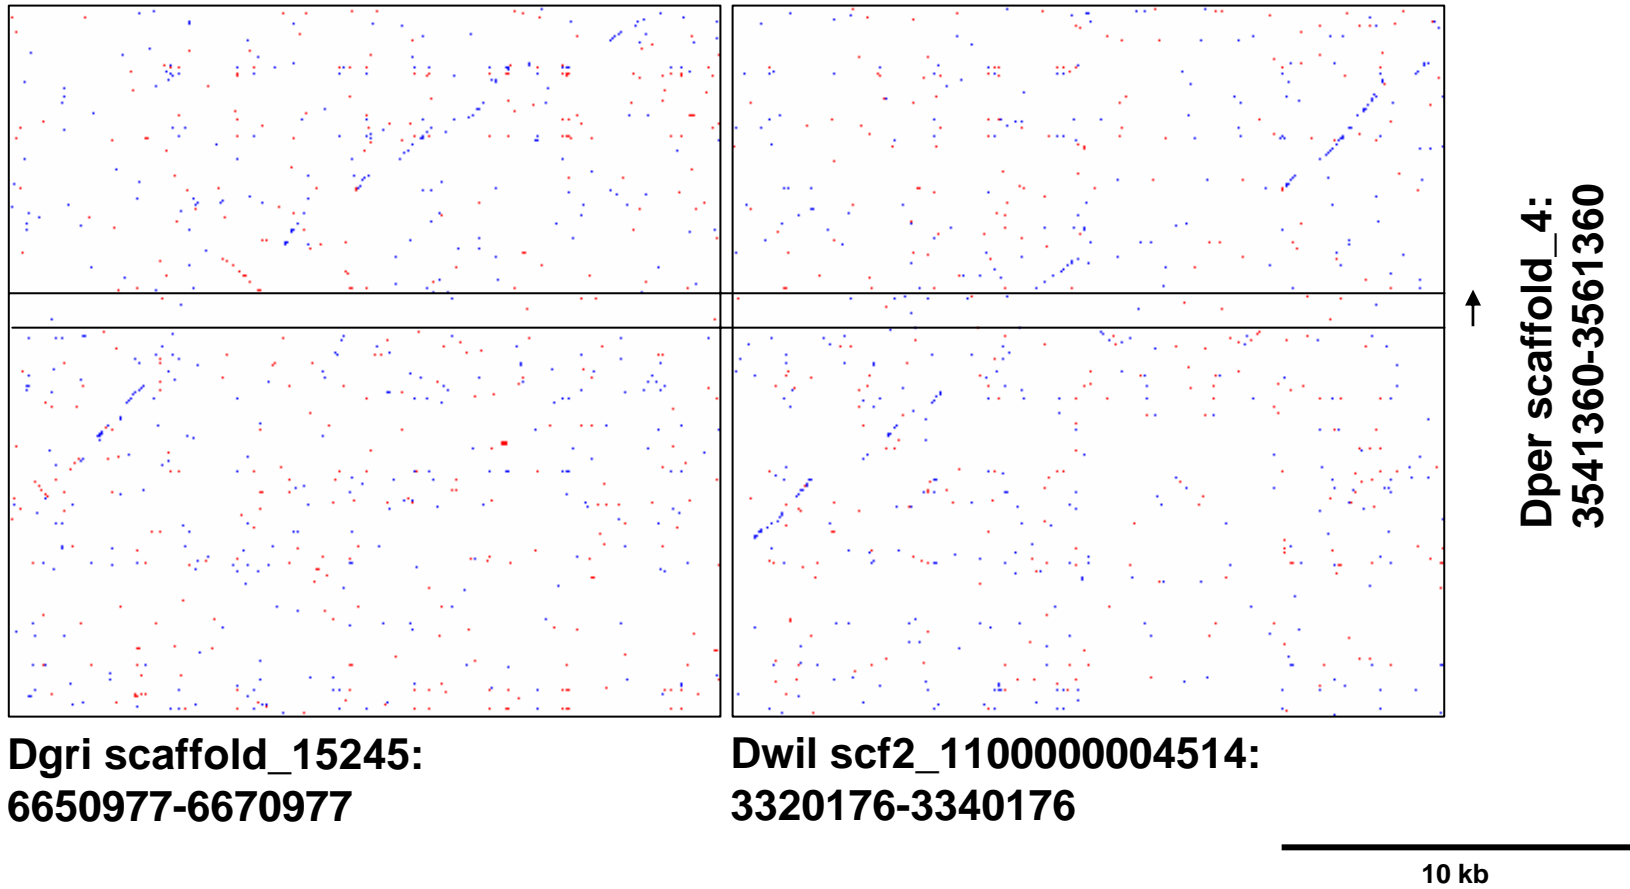

**Figure S4G**

*PpD5*

**Gene Insertion in Location 2**

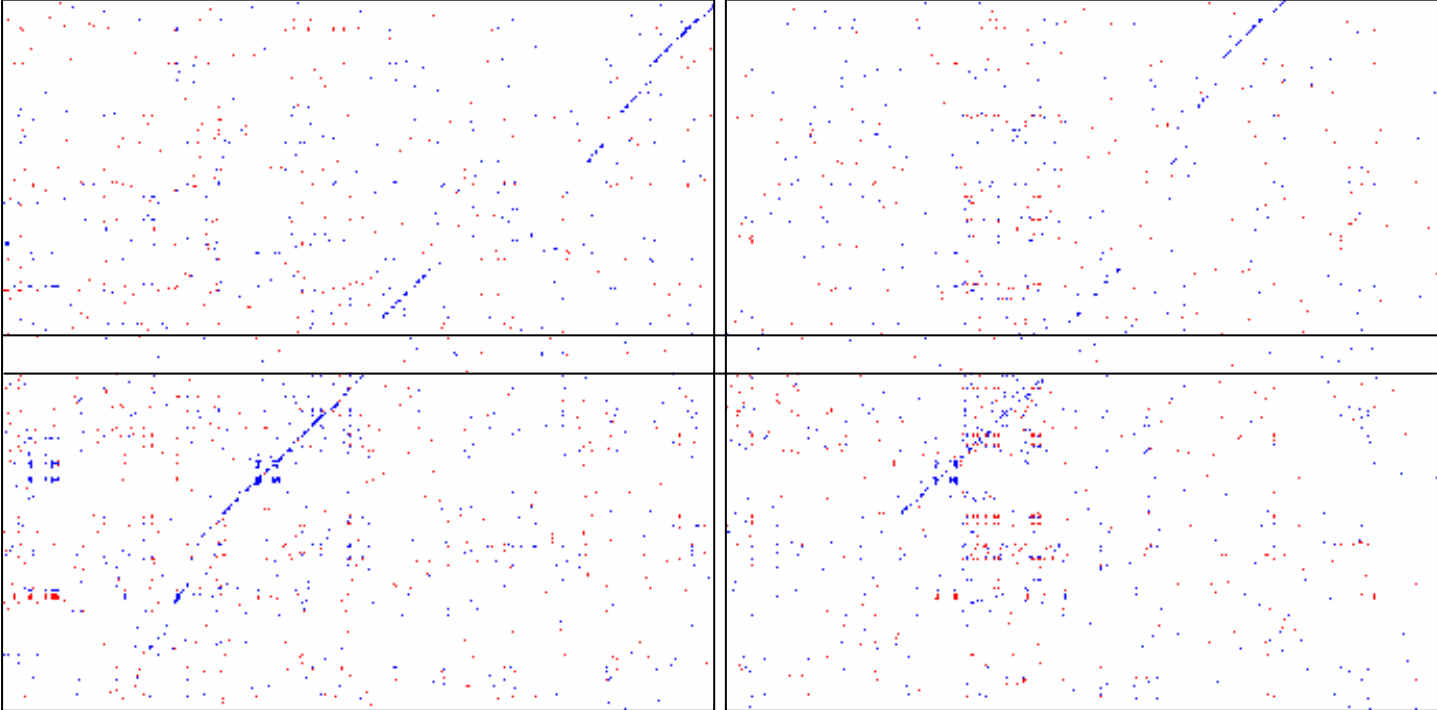

↓  
**Dmoj scaffold\_6496:  
16137357-16157357**

**Dgri scaffold\_15245:  
3897315-3917315**

**Dwil scf2\_1100000004513:  
6238264- 6258264**

10 kb
